# Supplementary material for: Suppressing lithium dendrite growth by a synergetic effect of uniform nucleation and inhibition
Source: Royal Society of Chemistry journal article supplement (doi:10.1039/c9ta13644d), 2020-01-01
Supplement: c9ta13644d1.pdf [file c9ta13644d1.pdf]

## Support Information

Li-Na Wu,<sup>a</sup> Jun Peng,<sup>a</sup> Fa-Ming Han,<sup>a</sup> Ya-Ke Sun,<sup>a</sup> Tian Sheng,<sup>c</sup> Yang-Yang Li,<sup>a</sup>

Yao-Zhou,<sup>b</sup> Ling Huang,<sup>\*a</sup> Jun-tao Li,<sup>b</sup> and Shi-Gang Sun<sup>\*a,b</sup>

<sup>a</sup> *Department of Chemistry, College of Chemistry and Chemical Engineering, Xiamen University, Xiamen, Fujian, 361005, China*

<sup>b</sup> *College of Energy and School of Energy Research, Xiamen University, Xiamen, Fujian 361005, China*

<sup>c</sup> *College of Chemistry and Materials Science, Anhui Normal University, Wuhu, Anhui 241000, China*

<sup>\*</sup> *Corresponding author*

*E-mail: huangl@xmu.edu.cn*

*E-mail: sgsun@xmu.edu.cn*

## Experimental Section

Li metal foil (Shenzhen Kejingstar, 0.4 mm) was used as the anode electrode. The graphite positive electrode was prepared by mixing of graphite, conductive carbon black, and poly-vinylidene fluoride (PVDF) in N-methyl-2-pyrrolidone (NMP) with a weight ratio of 8:1:1. The above mixture was stirring constantly to form uniform slurry at room temperature, which was then coated onto aluminum current collector (Shenzhen Kejingstar) and dried in vacuum in an 80 °C oven. The active materials loading in graphite cathode are 2.0~2.5 mg cm<sup>-2</sup>.

A glass microfiber filter (Whatman, grade 934-AH) was used as the separator. Lithium hexafluorophosphate (LiPF<sub>6</sub>), ethyl methyl carbonate (EMC) and vinylene carbonate (VC) were purchased from Dodochem. The AgPF<sub>6</sub> and LiNO<sub>3</sub> additive were kindly purchased from Alfa Aesar. The base electrolyte was composed of 4M LiPF<sub>6</sub>, EMC and VC (the 3vol% VC additive can improve the uniformity and flexibility of the interface film on electrode materials surface [1-3]). The 0.03 M LiNO<sub>3</sub> and AgPF<sub>6</sub> additive were added as important additives to improve the electrochemical performance of Li electrode. The effect of LiNO<sub>3</sub> was discussed in the reported work. The solubility of additives in the base electrolyte in 15<sup>th</sup> day at 30°C is shown in the optical image (Fig.S1). The preparation of electrolyte and fabrication of CR2025-type coin cells were conducted in an argon-filled glove box (MBraun, Germany) with the oxygen and water level below 0.1 ppm. When assembling a symmetric cell, Li electrodes were both employed on both sides of the separator. The electrolyte was composed of base electrolyte with or without additive. And for the Li-Graphite Dual-ion cells, Li electrode was used as anode, and graphite electrode was used as cathode. The electrolyte was also composed of base electrolyte with or without AgPF<sub>6</sub>-LiNO<sub>3</sub> hybrid electrolyte additive. And then the electrochemical performance was performed on a battery test system (LAND CT2011A).

## Characterization and Electrochemical tests

X-ray photoelectron spectroscopy (XPS) was carried out using Thermo Fisher Scientific K-Alpha. Scanning electron microscope (SEM) images were collected on a HITACHI S-4800 field emission scanning electron microscope (operating at 10 kV). The linear sweep voltammogram (LSV) curves of  $\text{Li}^+$  deposition on the Li anode were obtained in a three-electrode cell using the Li metal electrodes as the working electrode, counter electrode and reference electrode with a CHI660D electrochemical station (Chenhua, China) at a scan rate of  $1\text{ mV s}^{-1}$ . The area of the working electrode was  $2.51\text{ cm}^2$ . Galvanostatic charge–discharge tests were worked on LAND CT2011A battery testing instrument at room temperature. The electrochemical impedance spectrum (EIS) experiment test was carried out on a CHI760e electrochemical station (Chenhua, China). The ac voltage amplitude was 5 mV and the range of frequency was from 100 kHz to 10 mHz.

### **Computational methods**

Density functional theory (DFT) calculations were carried out using the Vienna Ab initio Simulation Package (VASP) program. Generalized gradient approximation (GGA) functional Perdew–Burke–Ernzerhof (PBE) functional of exchange–correlation and the projector-augmented-wave pseudopotentials were here utilized [4–8].

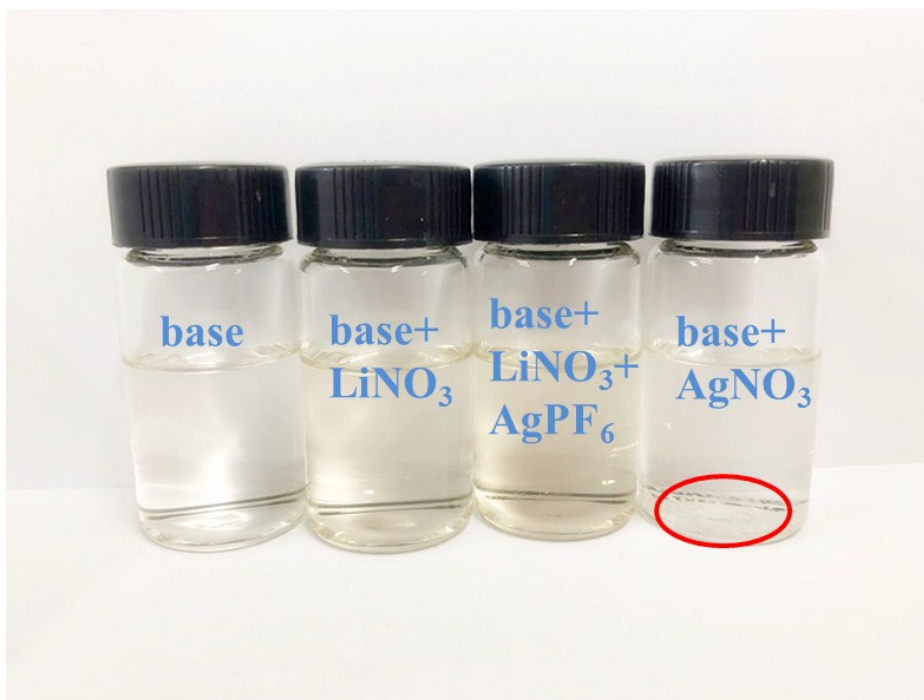

Fig.S1 The solubility of additives in the base electrolyte in 15<sup>th</sup> day at 30°C

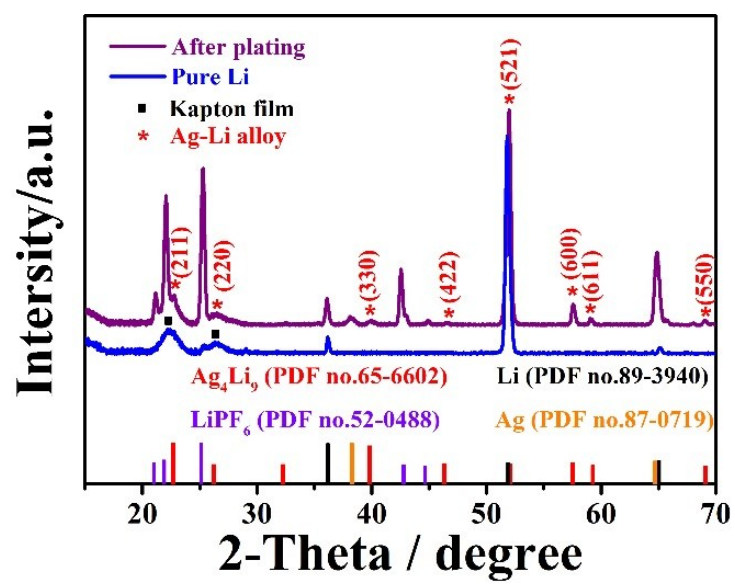

Fig.S2 XRD pattern of the pure Li foil and the Li foil after plating

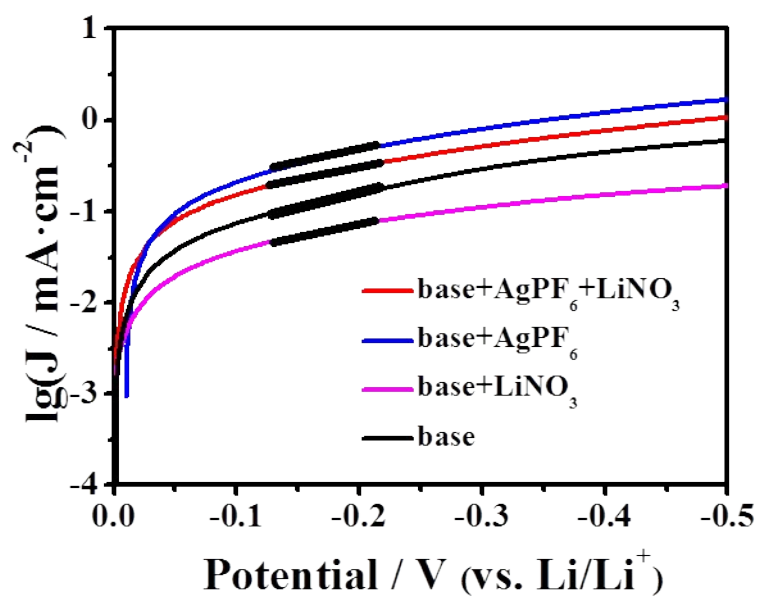

Figure S3 Exchange current densities of Li anodes in base electrolyte with different additive at 25°C as determined by fitting LSV curves.

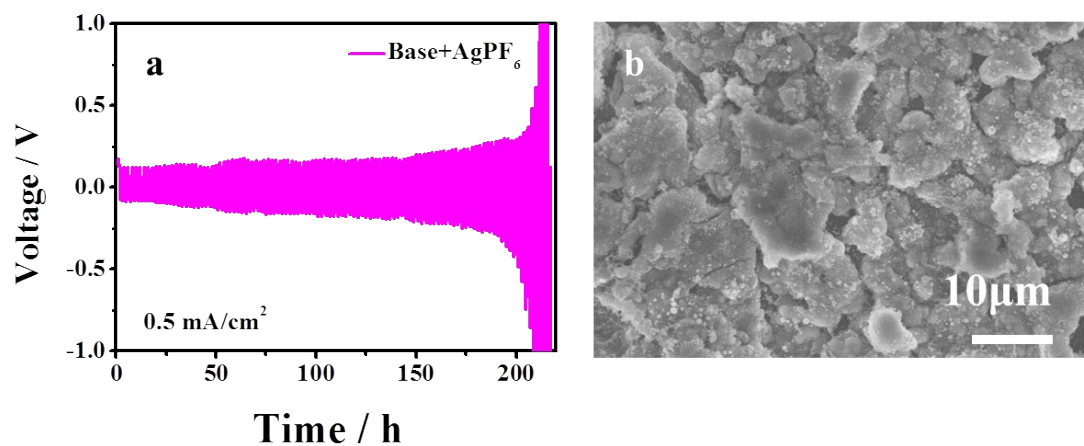

Figure S4 (a) The cycling performance of Li||Li symmetric cells with only AgPF<sub>6</sub> additive at current densities of 0.5 mA cm<sup>-2</sup>.  
(b) SEM images of Li anode after plating and stripping for 200 h in the base electrolyte with only AgPF<sub>6</sub> additives.

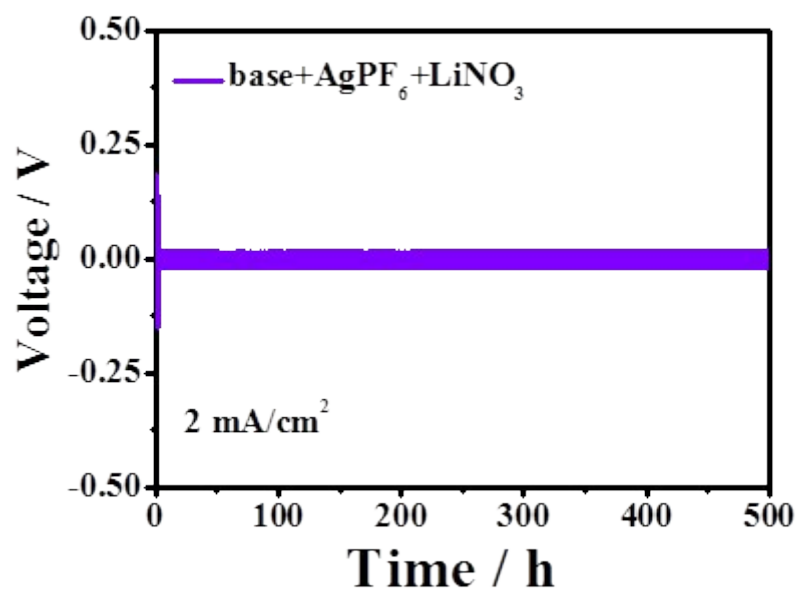

Figure S5 Cycling performance of Li||Li symmetric cells with AgPF<sub>6</sub>-LiNO<sub>3</sub> additive at current densities of 2.0 mA cm<sup>-2</sup>.



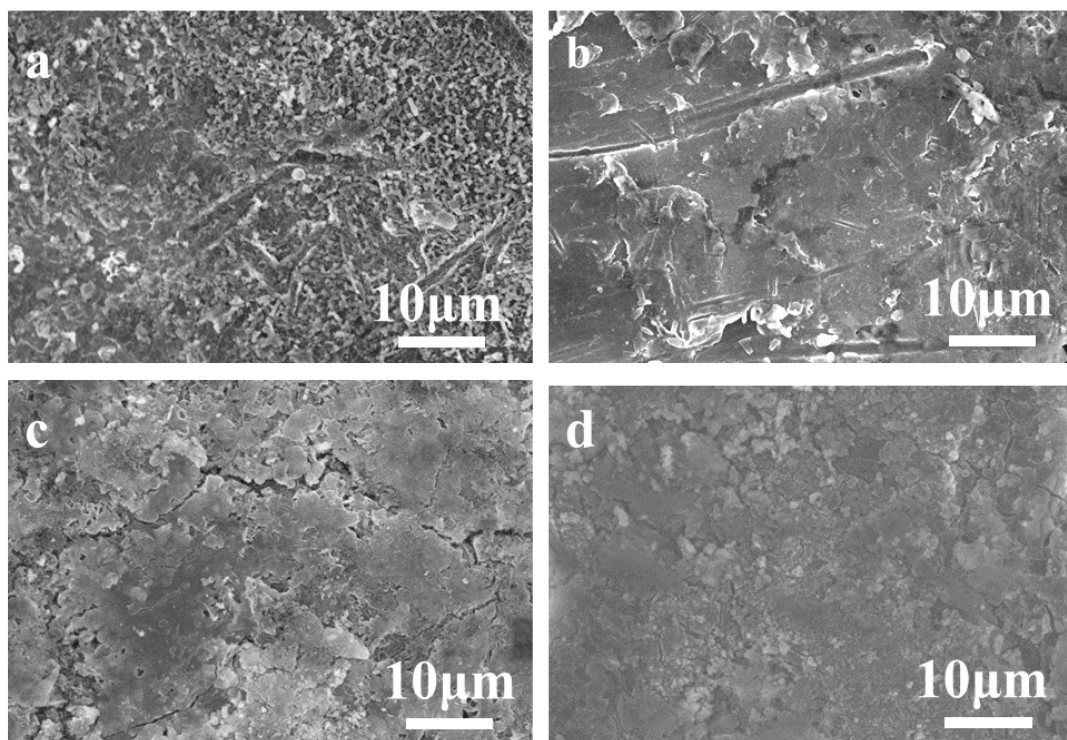

Figure S6 SEM images of Li anode after plating and stripping for 40 h in the baseline electrolyte (a) and in the base electrolyte with  $\text{LiNO}_3$  additive (b). The SEM images of Li anode after plating and stripping for 200 h in the base electrolyte with  $\text{LiNO}_3$  additive (c) and with  $\text{AgPF}_6\text{-LiNO}_3$  additive (d).

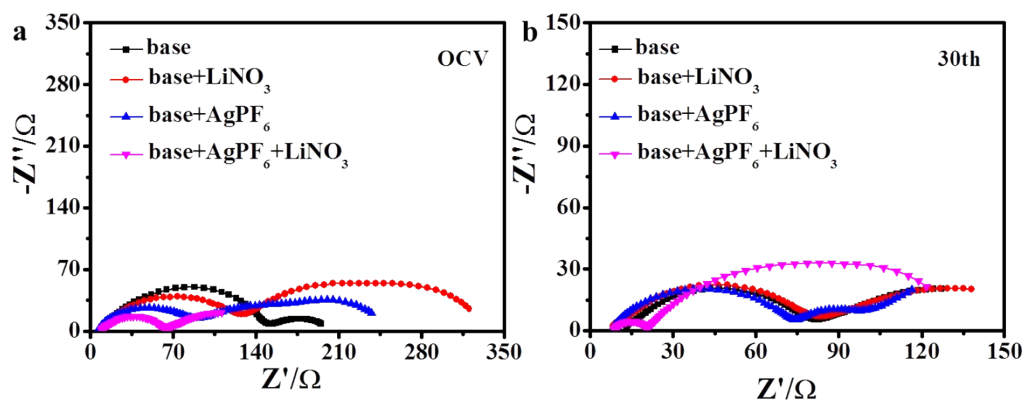

Figure S7 EIS of the Li||Li symmetric cell before cycling (a) and after 30 cycles (b) at a current density of  $0.5 \text{ mA cm}^{-2}$  without or with different additives.

Table S1 The fitted value of electrochemical impedance spectroscopy (EIS) about the Li||Li symmetric cell before cycling (a) and after 30 cycles (b) at a current density of 0.5 mA cm<sup>-2</sup> with fixed capacity of 0.5 mAh cm<sup>-2</sup> without or with different additives.

|                                             | R <sub>SEI</sub> (OCV) | R <sub>SEI</sub> (30 <sup>th</sup> ) |
|---------------------------------------------|------------------------|--------------------------------------|
| base                                        | 38.82                  | 61.73                                |
| base+LiNO <sub>3</sub>                      | 118.5                  | 64.24                                |
| base+AgPF <sub>6</sub>                      | 79.65                  | 66.9                                 |
| base+ AgPF <sub>6</sub> + LiNO <sub>3</sub> | 43.93                  | 12                                   |

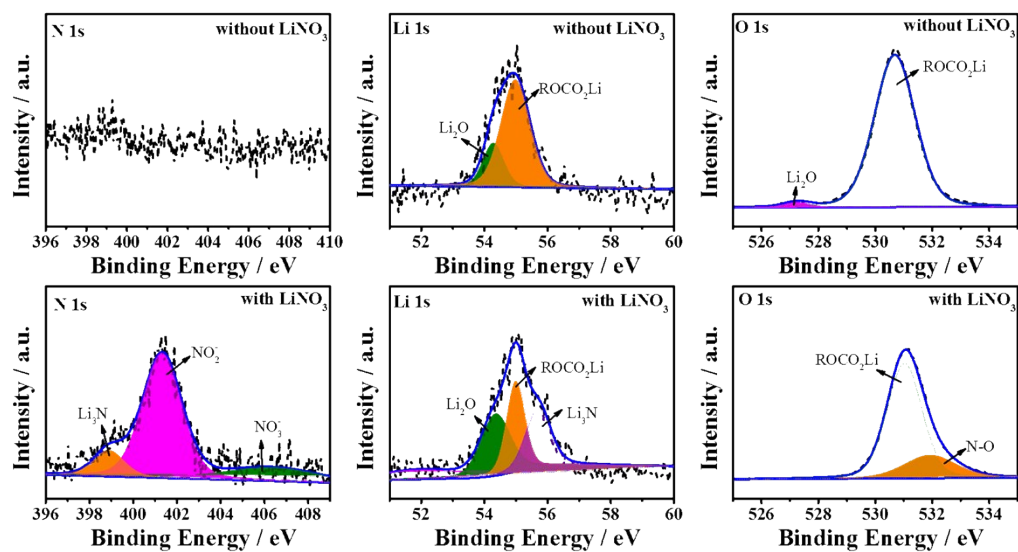

Fig. S8 XPS characterization for the Li anode cycled in electrolyte without and with  $\text{LiNO}_3$  .

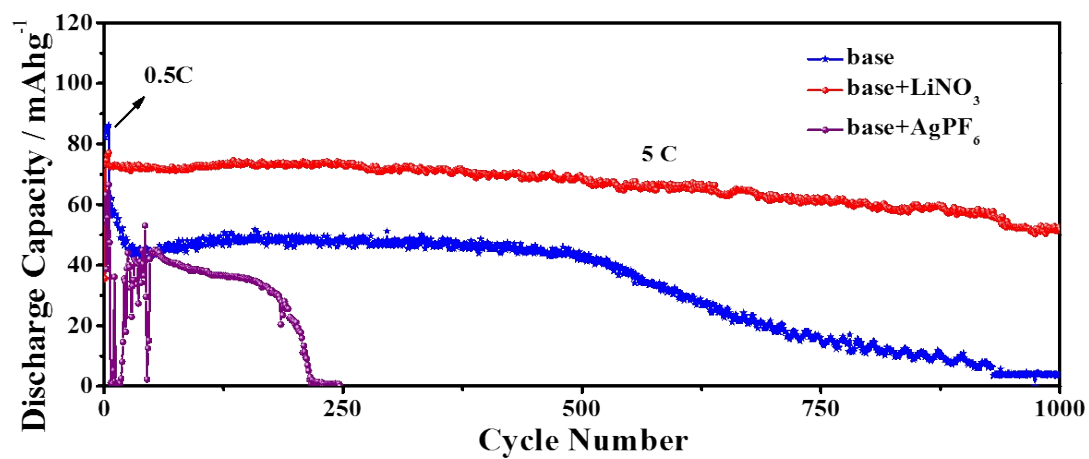

Figure S9 Long-term test results of the Li-G DIB without or with LiNO<sub>3</sub> additive or with AgPF<sub>6</sub> additive at 0.5 C (1 to 10 cycles) and 5C (11 to 1000 cycles).

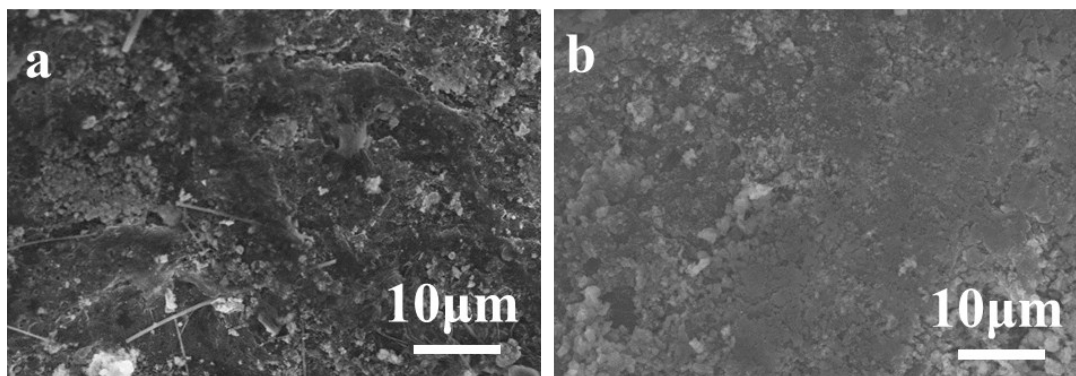

Figure S10 SEM images of the Li anode in electrolyte with  $\text{LiNO}_3$  additive (a) or with  $\text{AgPF}_6$  -  $\text{LiNO}_3$  additive (b) after 500 cycles at 5 C.

Table S2. Performance comparison of this work and reported DIBs.

| DIB structure                                                            | Reversible capacity                                    | Capacity retention | Cycle number | Estimated energy density                                                                                       | Reference |
|--------------------------------------------------------------------------|--------------------------------------------------------|--------------------|--------------|----------------------------------------------------------------------------------------------------------------|-----------|
| CNFs-Li LiPF <sub>6</sub> -EMC Graphite                                  | 92.2 mAh g <sup>-1</sup><br>(1000 mA g <sup>-1</sup> ) | 86.4%              | 2000         |                                                                                                                | [9]       |
| Graphite LiPF <sub>6</sub> -FEC<br>EMC-HFIP Graphite                     | 60 mAh g <sup>-1</sup><br>(50 mA g <sup>-1</sup> )     | 67%                | 50           |                                                                                                                | [10]      |
| Si-compound LiBF <sub>4</sub> -PC Graphite                               | 80 mAh g <sup>-1</sup><br>(100 mA g <sup>-1</sup> )    | 84%                | 100          | 54 Wh kg <sup>-1</sup>                                                                                         | [11]      |
| MoO <sub>3</sub>  LiPF <sub>6</sub> -EC-DMC Graphite                     | 81 mAh g <sup>-1</sup><br>(100 mA g <sup>-1</sup> )    | 90%                | 200          | 77 Wh kg <sup>-1</sup>                                                                                         | [12]      |
| TiO <sub>2</sub>  LiPF <sub>6</sub> -EC-DMC Graphite                     | 44 mAh g <sup>-1</sup><br>(100 mA g <sup>-1</sup> )    | 88%                | 50           | 36 Wh kg <sup>-1</sup>                                                                                         | [13]      |
| Al LiPF <sub>6</sub> -EMC Graphite                                       | 100 mAh g <sup>-1</sup><br>(200 mA g <sup>-1</sup> )   | 88%                | 200          | 220 Wh kg <sup>-1</sup><br>(130 W kg <sup>-1</sup> );<br>150 Wh kg <sup>-1</sup><br>(1200 W kg <sup>-1</sup> ) | [14]      |
| pAl/C LiPF <sub>6</sub> -EMC Graphite                                    | 104 mAh g <sup>-1</sup><br>(200 mA g <sup>-1</sup> )   | 89.4%              | 1000         | 232 Wh kg <sup>-1</sup><br>(446 W kg <sup>-1</sup> );<br>180 Wh kg <sup>-1</sup><br>(3597 W kg <sup>-1</sup> ) | [15]      |
| Li LiTFSI-Pyr <sub>14</sub> TFSI KS6L                                    | 50.1 mAh g <sup>-1</sup><br>(50 mA g <sup>-1</sup> )   | 97%                | 500          | 100 Wh kg <sup>-1</sup>                                                                                        | [16]      |
| Li LiPF <sub>6</sub> -EMC Graphite                                       | 69 mAh g <sup>-1</sup><br>(400 mA g <sup>-1</sup> )    | 81%                | 1000         | 243 Wh kg <sup>-1</sup><br>(486 W kg <sup>-1</sup> );<br>350 Wh kg <sup>-1</sup><br>(1750 W kg <sup>-1</sup> ) | [17]      |
| Li LiPF <sub>6</sub> -EMC-AgPF <sub>6</sub> -LiNO <sub>3</sub>  Graphite | 80 mAh g <sup>-1</sup><br>(500 mA g <sup>-1</sup> )    | 88%                | 1000         | 374 Wh kg <sup>-1</sup><br>(748 W kg <sup>-1</sup> );<br>360 Wh kg <sup>-1</sup><br>(2250 W kg <sup>-1</sup> ) | This work |

Calculation method of specific energy density (see reference [14])

## References

- [1] L. Chen, K. Wang, X. Xie, and J. Xie, Effect of vinylene carbonate (VC) as electrolyte additive on electrochemical performance of Si film anode for lithium ion batteries, *J. Power Sources*. 174 (2007) 538-543.
- [2] J. Chai, Z. Liu, J. Ma, J. Wang, X. Liu, H. Liu, J. Zhang, G. Cui, and L. Chen, In Situ Generation of Poly (Vinylene Carbonate) Based Solid Electrolyte with Interfacial Stability for LiCoO<sub>2</sub> Lithium Batteries, *Adv Sci (Weinh)* 4 (2017) 1600377.
- [3] P. Jankowski, W. Wieczorek, and P. Johansson, SEI-forming electrolyte additives for lithium-ion batteries: development and benchmarking of computational approaches, *J Mol Model* 23 (2017) 6.
- [4] G. Kresse, and J. Hafner, Ab initio molecular dynamics for open-shell transition metals, *Phys Rev B Condens Matter* 48 (1993) 13115-13118.
- [5] G. Kresse, and J. Furthmuler, Efficient iterative schemes for ab initio total-energy calculations using a plane-wave basis set, *Phys. Rev. B* 54 (1996) 11169-11186.
- [6] J. P. Pedrew, K. Burke, and M. Ernzerhof, Generalized gradient approximation made simple, *Phys. Rev. Lett.* 77 (1996) 3865-3868.
- [7] G. Kresse, and D. Joubert, From Ultrasoft pseudopotentials to the projector augmented-wave method., *Phys. Rev. B* 59 (1999) 1758-1775.
- [8] P. E. Blochl, Projector augmented-wave method, *Phys Rev B Condens Matter* 50 (1994) 17953-17979.
- [9] X. T. Xi, X. Feng, X. J. Nie, B. H. Hou, W. H. Li, X. Yang, A. B. Yang, W. D. Sun, and X. L. Wu, Dendrite-free deposition on lithium anode toward long-life and high-stable Li//graphite dual-ion battery, *Chem. Commun.* 55 (2019) 8406-8409.
- [10] J. A. Read, A. V. Cresce, M. H. Ervin, and K. Xu, Dual-Graphite Chemistry Enabled by a High Voltage Electrolyte, *Energy Environ. Sci.* 7 (2014) 617-620.
- [11] H. Nakano, Y. Sugiyama, Tetsuya Morishita, M. J. S. Spencer, I. K. Snook, Y. Kumaia, and H. Okamoto, Anion secondary batteries utilizing a reversible BF<sub>4</sub> insertion/extraction two-dimensional Si material, *Journal of Materials Chemistry A* (2014) 7588-7592
- [12] N. Gunawardhana, G.-J. Park, N. Dimov, A. K. Thapa, H. Nakamura, H. Wang, T. Ishihara, and M. Yoshio, Constructing a novel and safer energy storing system using a graphite cathode and a MoO<sub>3</sub> anode, *J. Power Sources*. (2011)
- [13] A. K. Thapa, G. Park, H. Nakamura, T. Ishihara, N. Moriyama, T. Kawamura, H. Wang, and M. Yoshio, Novel graphite/TiO<sub>2</sub> electrochemical cells as a safe electric energy storage system, *Electrochim. Acta* 55 (2010) 7305-7309.
- [14] X. Zhang, Y. Tang, F. Zhang, and C.-S. Lee, A Novel Aluminum-Graphite Dual-Ion Battery, *Adv. Energy Mater.* 6 (2016)
- [15] L. N. Wu, J. Peng, Y. K. Sun, F. M. Han, Y. F. Wen, C. G. Shi, J. J. Fan, L. Huang, J. T. Li, and S. G. Sun, High-Energy Density Li metal Dual-Ion Battery with a Lithium Nitrate-Modified Carbonate-Based Electrolyte, *ACS Appl. Mater. Inter.* 11 (2019) 18504-18510.
- [16] T. Placke, O. Fromm, S. F. Lux, P. Bieker, S. Rothermel, H. W. Meyer, S. Passerini, and M. Winter, Reversible Intercalation of Bis(trifluoromethanesulfonyl)imide Anions from an Ionic Liquid Electrolyte into Graphite for High Performance Dual-Ion Cells, *J. Electrochem. Soc.* 159 (2012) A1755-A1765.
- [17] X. Tong, F. Zhang, B. Ji, M. Sheng, and Y. Tang, Carbon-Coated Porous Aluminum Foil Anode



for High-Rate, Long-Term Cycling Stability, and High Energy Density Dual-Ion Batteries, Adv. Mater. 28 (2016) 9979-9985.
